# Supplementary material for: A Metabolome and Microbiome Analysis of Acute Myeloid Leukemia: Insights into the Carnosine–Histidine Metabolic Pathway
Source: MDPI journal article supplement (doi:10.3390/toxics12010014), 2023-12-22
Supplement: s1 [file s1]

## Supplementary Materials: A Metabolome and Microbiome Analysis of Acute Myeloid Leukemia: Insights into the Carnosine–Histidine Metabolic Pathway

Binxiong Wu, Yuntian Xu, Miaomiao Tang, Yingtong Jiang, Ting Zhang, Lei Huang, Shuyang Wang, Yanhui Hu, Kun Zhou, Xiaoling Zhang and Minjian Chen

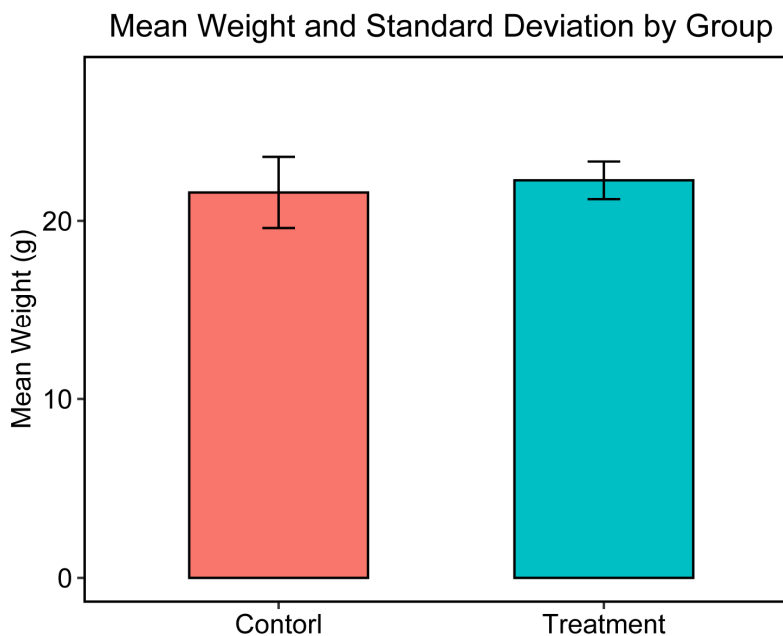

Figure S1. Bar graph of mouse body weight during grouping,  $p > 0.05$ .

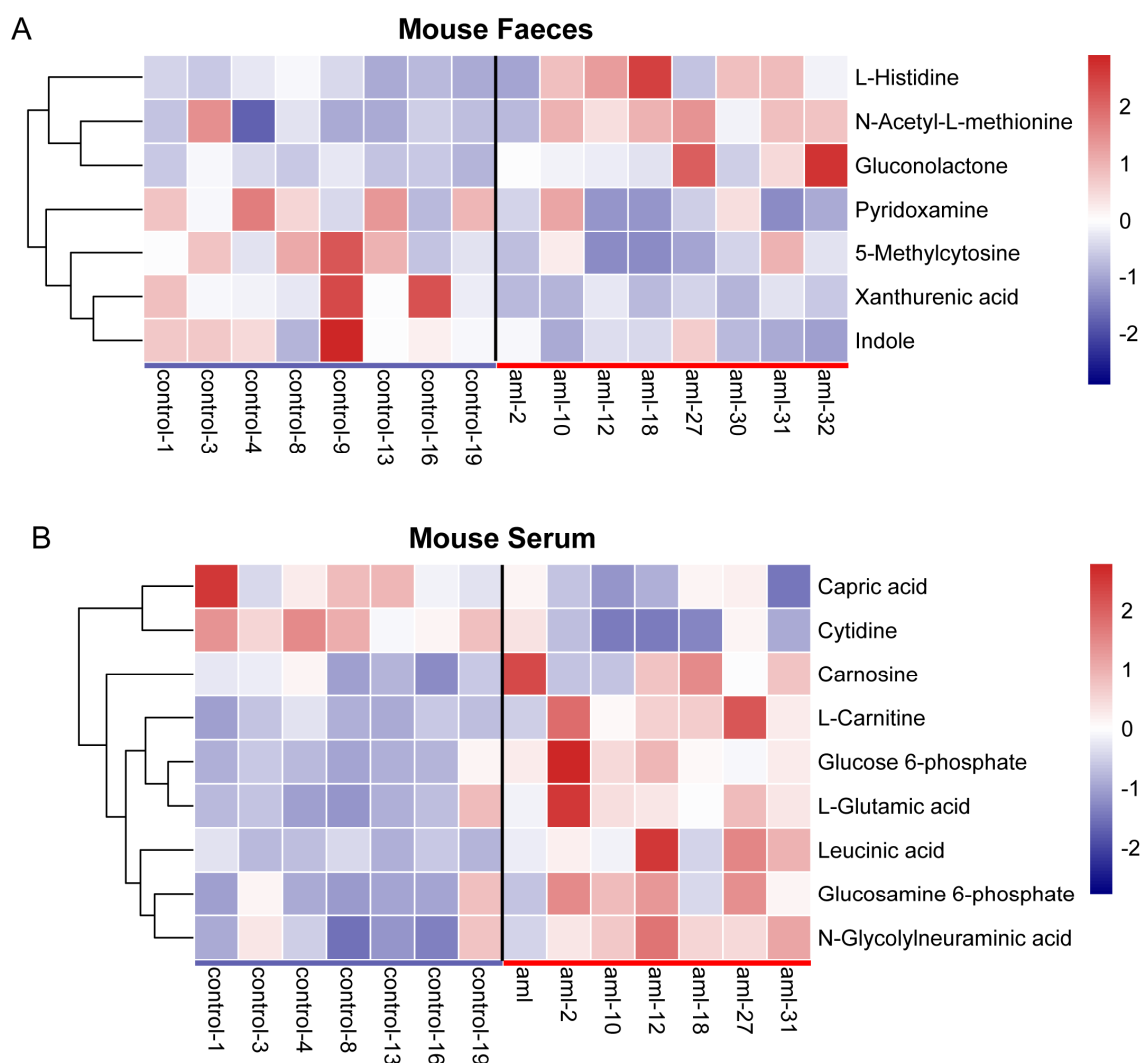

**Figure S2.** Differential metabolite heatmap in mouse samples. (A) Differential Metabolites in Mouse Feces. (B) Differential Metabolites in Mouse Serum. The horizontal axis represents the individual samples, while the vertical axis lists the metabolites. Each cell in the heatmap corresponds to the scaled abundance of a metabolite in a sample. Data were normalized by row and hierarchical clustering was applied to group metabolites with similar abundance patterns across the samples. The color intensity indicates the level of metabolite abundance, with red representing higher abundance and blue indicating lower abundance.

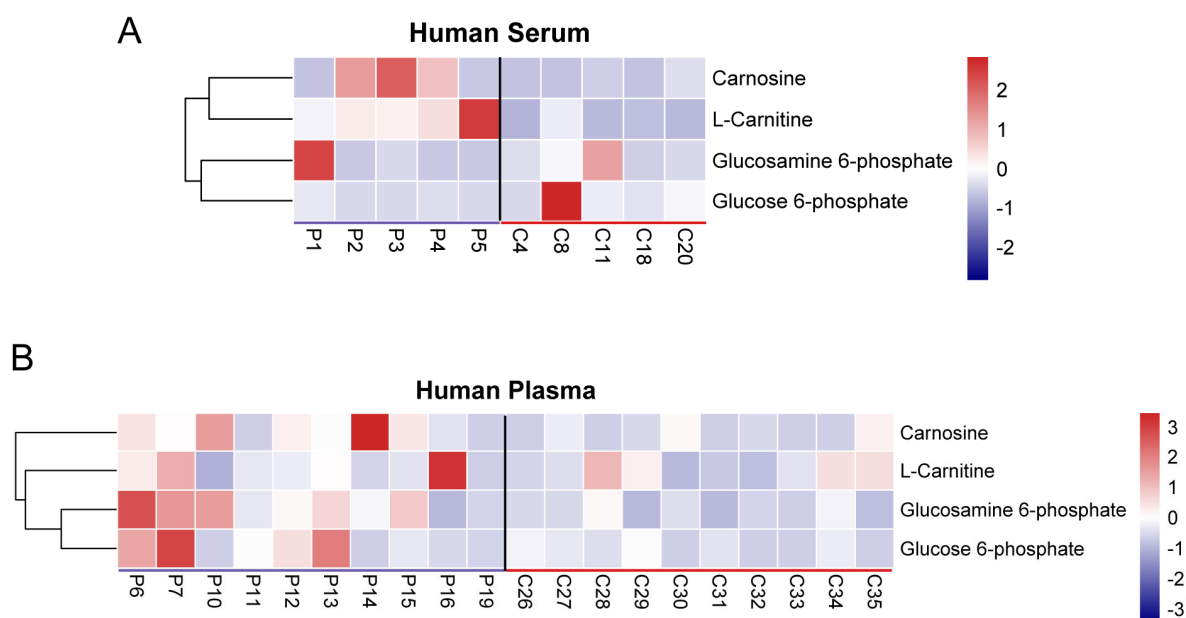

**Figure S3.** Differential metabolite heatmap in human samples. (A) Differential Metabolites in Human Serum. (B) Differential Metabolites in Human Plasma. The horizontal axis represents the individual samples, while the vertical axis lists the metabolites. Each cell in the heatmap corresponds to the scaled abundance of a metabolite in a sample. Data were normalized by row and hierarchical clustering was applied to group metabolites with similar abundance patterns across the samples. The color intensity indicates the level of metabolite abundance, with red representing higher abundance and blue indicating lower abundance.

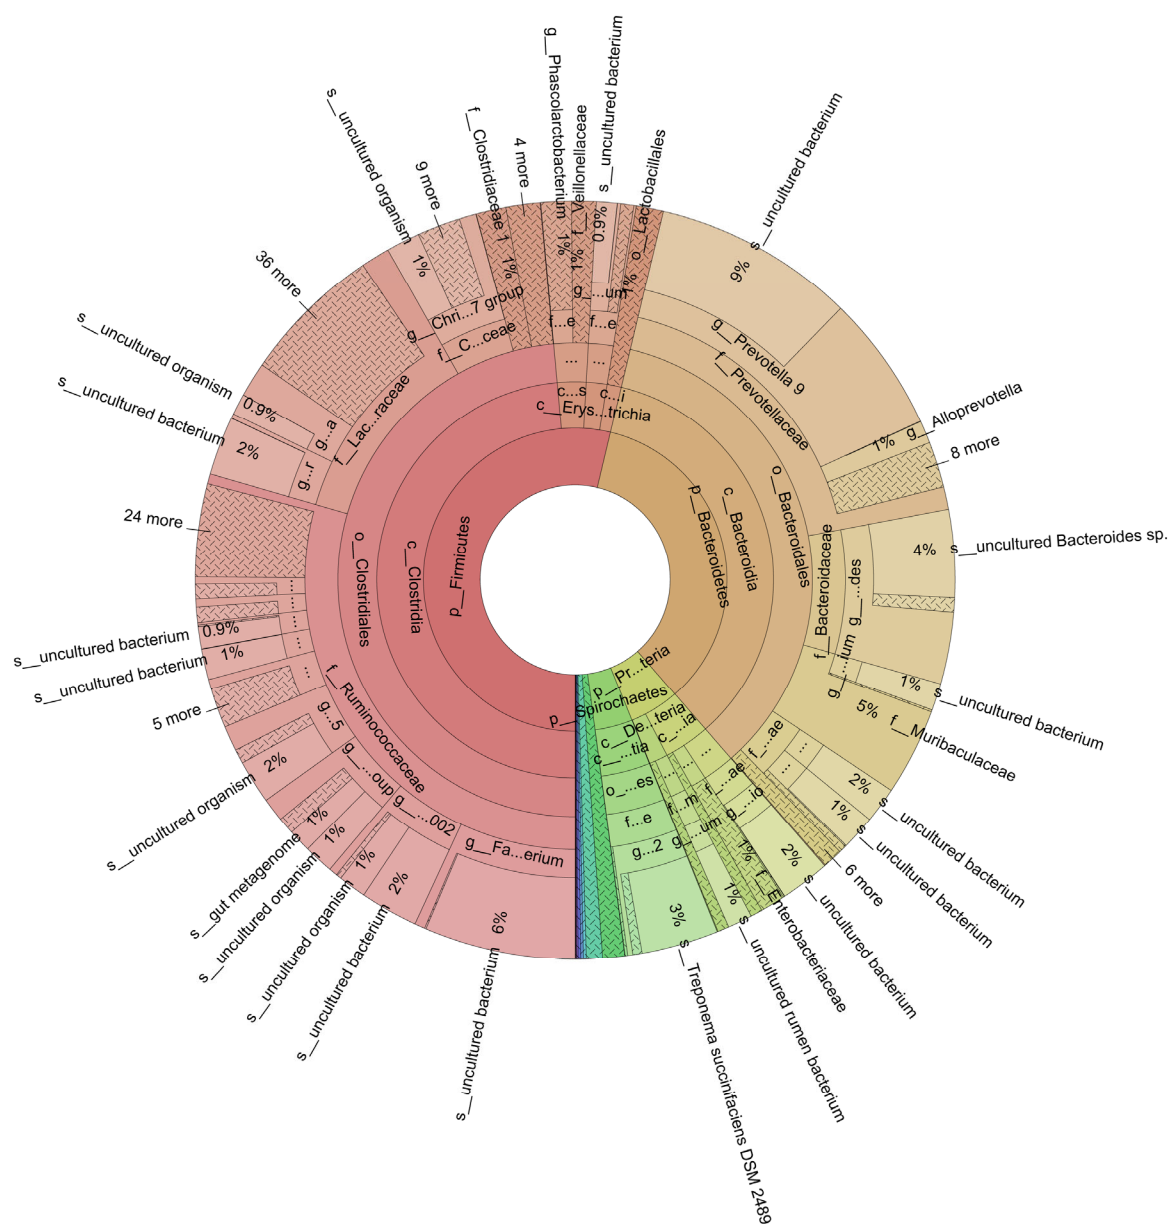

**Figure S4.** Hierarchical sample circle plot of gut microbiota in AML group mice, showing the classification levels from inner to outer as phylum, class, order, family, genus, and species.

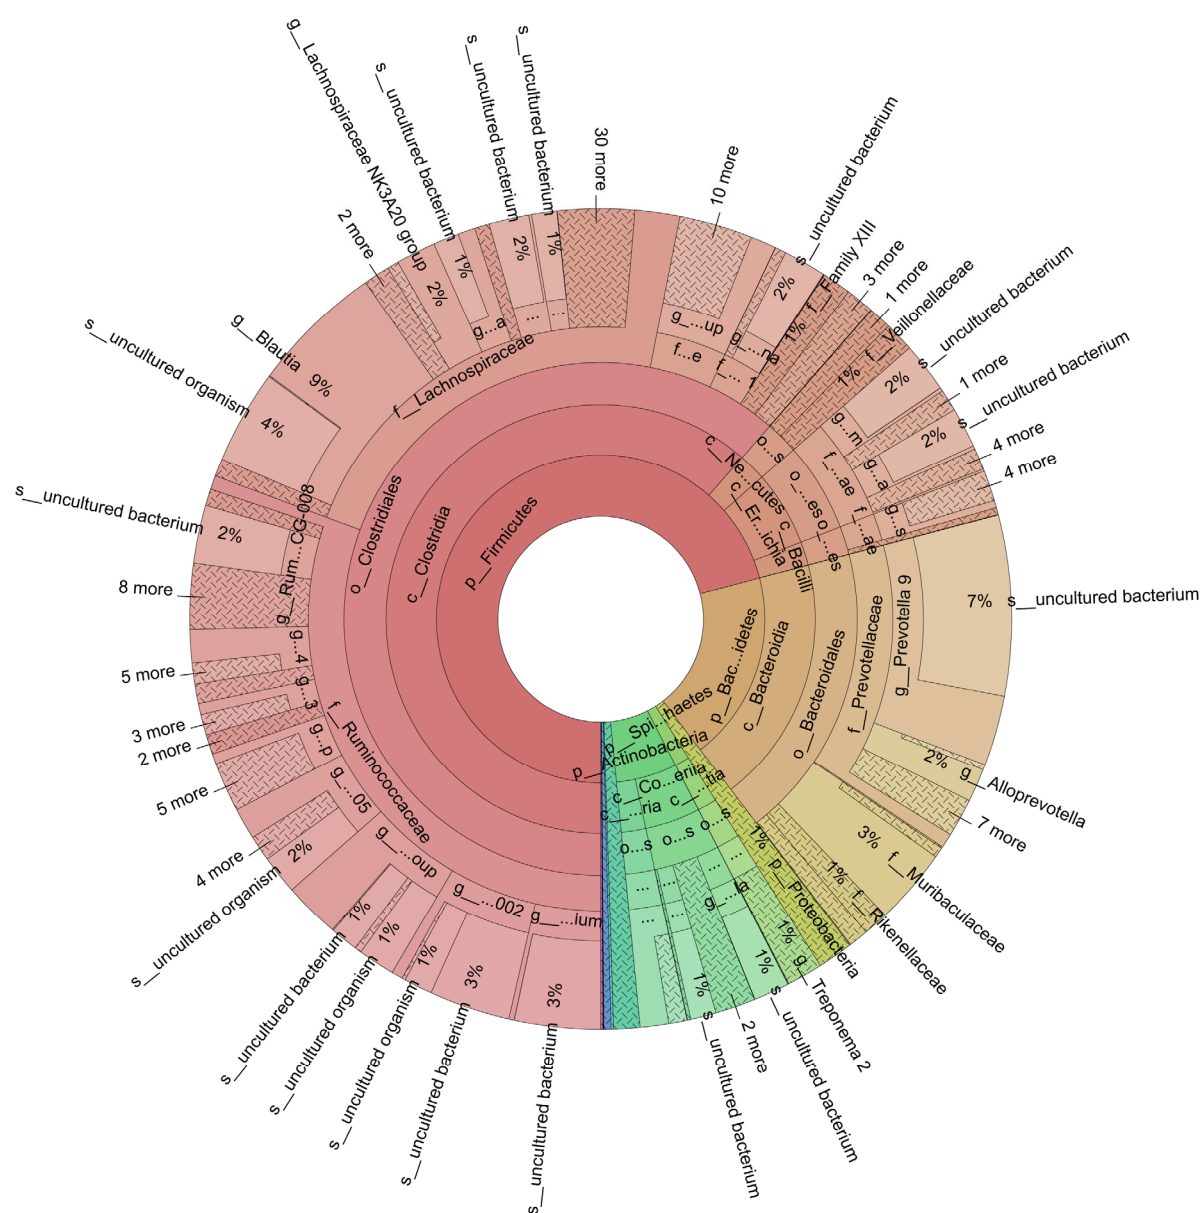

**Figure S5.** Hierarchical sample circle plot of gut microbiota in control group mice, showing the classification levels from inner to outer as phylum, class, order, family, genus, and species.

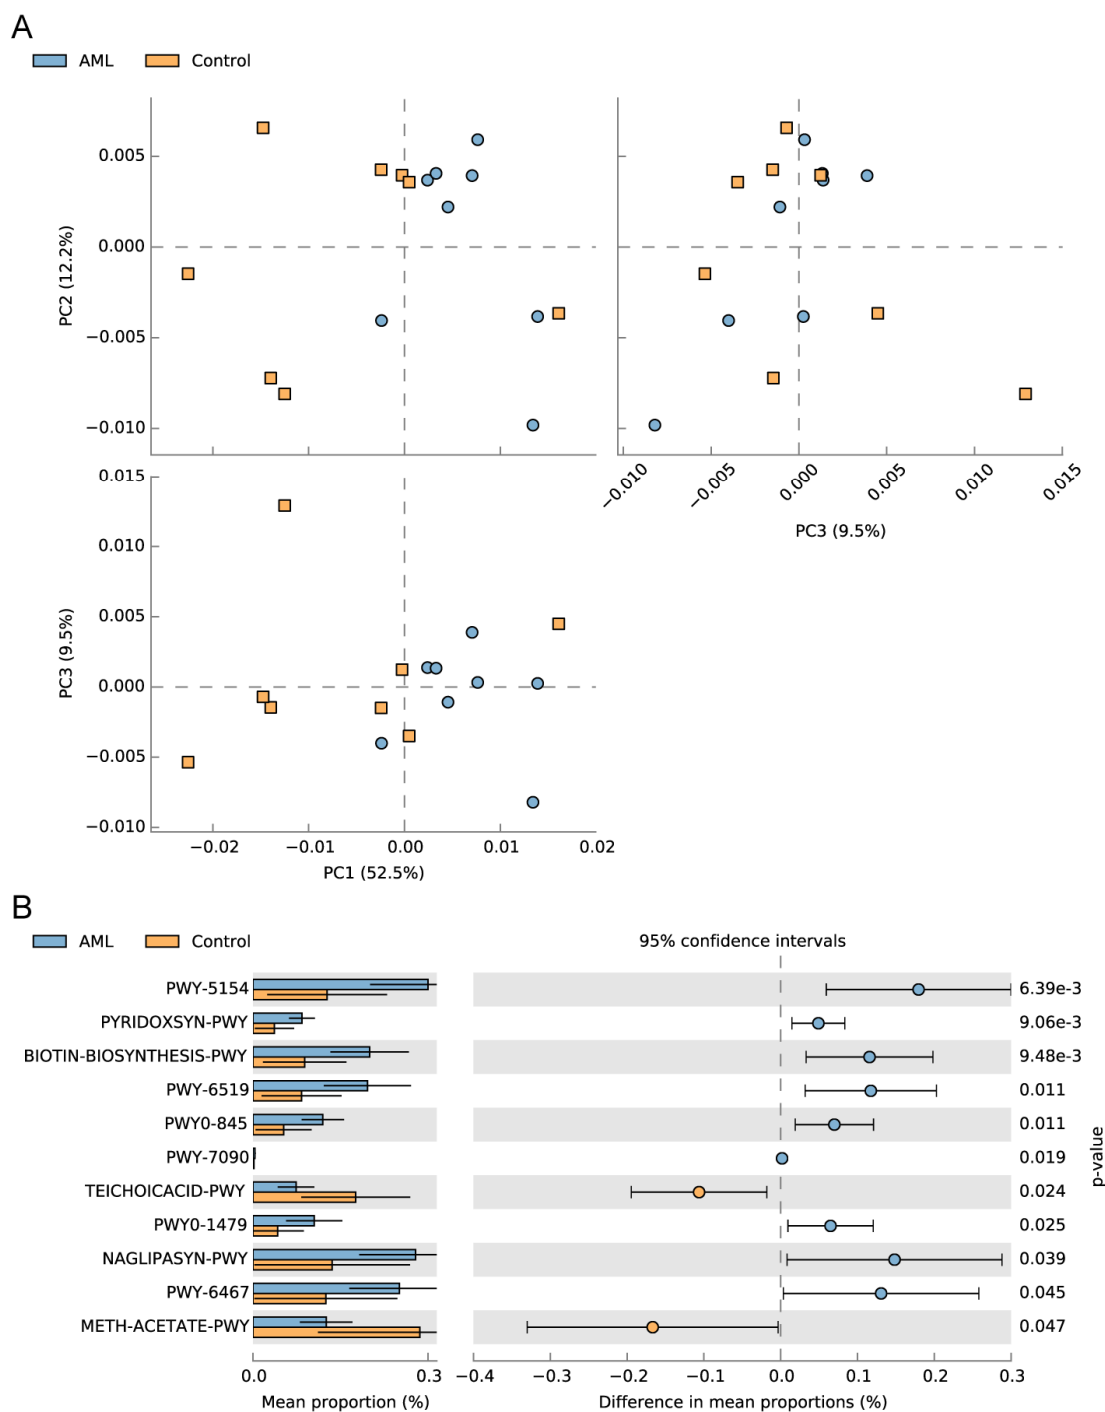

**Figure S6.** Picrust2 analysis results of mouse gut microbiota. (A) PCA score plots of predicted pathway abundance. The top left plot shows the first principal component (PC1) and the second principal component (PC2), the top right plot shows PC2 and the third principal component (PC3), and the bottom left plot shows PC1 and PC3. Each point represents a sample, color-coded by group. (B) Extended error bar plots of pathway, showing only items with p-value < 0.05 and fold change > 2, color-coded by group.

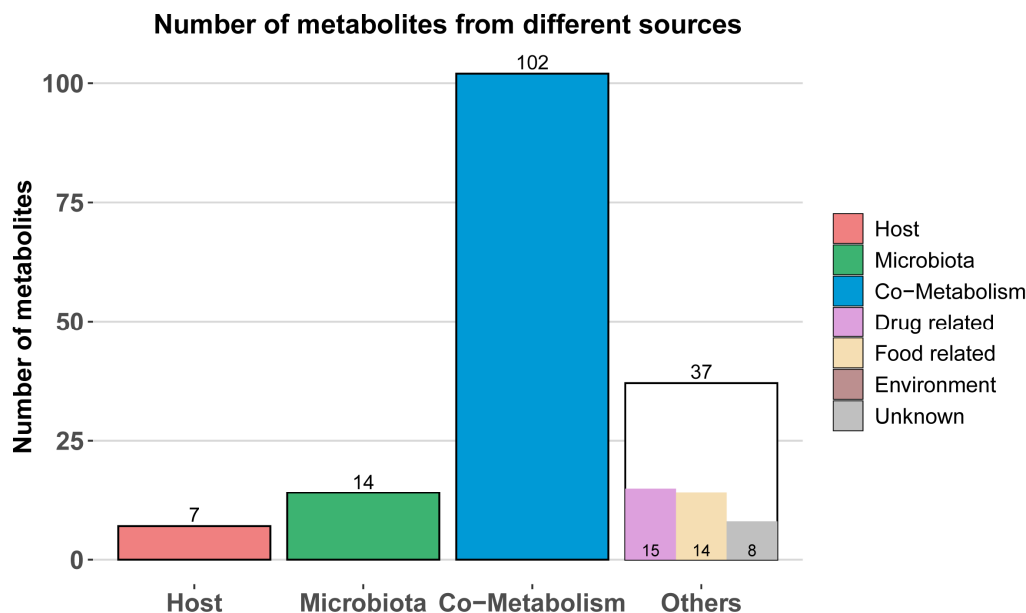

**Figure S7.** Bar chart showing the sources of all detected metabolites in the mouse samples.

**Table S1.** Quality information for amplified sub-sequence raw data and clean data.

| SampleID  | rawDataReads | cleanDataReads | rawMeanLength | cleanMeanLength | rawDataBase | cleanDataBase | Q20   |
|-----------|--------------|----------------|---------------|-----------------|-------------|---------------|-------|
| AML10     | 37,785       | 37,778         | 466           | 365             | 17,631,585  | 13,813,403    | 97.69 |
| AML12     | 30,398       | 30,394         | 467           | 366             | 14,213,649  | 11,142,249    | 97.73 |
| AML18     | 37,321       | 37,319         | 467           | 366             | 17,438,528  | 13,668,524    | 97.8  |
| AML2      | 45,369       | 45,363         | 466           | 365             | 21,151,874  | 16,567,871    | 97.87 |
| AML27     | 38,000       | 37,996         | 465           | 364             | 17,696,485  | 13,857,284    | 97.78 |
| AML30     | 40,481       | 40,479         | 466           | 365             | 18,884,086  | 14,794,931    | 97.82 |
| AML31     | 41,259       | 41,257         | 462           | 361             | 19,091,868  | 14,924,078    | 97.85 |
| AML32     | 40,205       | 40,187         | 467           | 366             | 18,802,755  | 14,735,706    | 98.22 |
| Control1  | 37,011       | 37,007         | 462           | 361             | 17,115,007  | 13,375,603    | 97.95 |
| Control13 | 43,545       | 43,532         | 458           | 357             | 19,977,609  | 15,575,166    | 98.26 |
| Control16 | 35,013       | 35,010         | 460           | 359             | 16,134,269  | 12,597,204    | 97.99 |
| Control19 | 35,068       | 35,065         | 464           | 363             | 16,295,740  | 12,753,040    | 97.83 |
| Control3  | 37,260       | 37,248         | 463           | 362             | 17,266,570  | 13,499,836    | 97.86 |
| Control4  | 39,417       | 39,414         | 471           | 370             | 18,594,066  | 14,612,117    | 97.78 |
| Control8  | 40,106       | 40,104         | 463           | 362             | 18,604,109  | 14,552,840    | 97.73 |
| Control9  | 30,087       | 30,085         | 461           | 360             | 13,884,133  | 10,844,723    | 97.76 |

The first column represents the sample names, while the second, fourth, and sixth columns display the number of reads, average length, and base count of the raw data before data cleaning. The third, fifth, and seventh columns show the number of reads, average length, and base count of the clean data after data cleaning. The last column indicates the percentage of high-quality bases.

**Table S2.** Comparison of five alpha diversity indices between AML group and control group.

| Estimators | AML-Mean | AML-Sd | Control-Mean | Control-Sd | p value |
|------------|----------|--------|--------------|------------|---------|
| Sobs       | 605      | 238    | 612          | 178        | 0.948   |
| Chao1      | 679      | 264    | 713          | 179        | 0.773   |
| Shannon    | 6.41     | 1.12   | 6.55         | 0.789      | 0.772   |
| Simpson    | 0.955    | 0.0447 | 0.97         | 0.0137     | 0.382   |
| PD         | 37.3     | 13.8   | 39.2         | 8.66       | 0.748   |
